# Supplementary material for: Impact of an e-cigarette tax on cigarette and e-cigarette use in a middle-income country: a study from Indonesia using a pre–post design
Source: HighWire-hosted journal article supplement (doi:10.1136/bmjopen-2021-055483), 2022-05-01
Supplement: bmjopen-2021-055483supp001_data_supplement.pdf [file bmjopen-2021-055483supp001_data_supplement.pdf]

**Supplementary Table A.** Change in price paid for e-liquid per 60 ml between Wave 1 and Wave 2

| Change in price paid for e-liquid per 60 ml | N (%)      |
|---------------------------------------------|------------|
| Paid more for e-liquid at Wave 2            | 502 (49.4) |
| Paid the same for e-liquid at Wave 2        | 181 (17.8) |
| Paid less for e-liquid at Wave 2            | 334 (32.8) |

**Supplementary Table B.** Stockpiling and price minimization techniques at Wave 1 and Wave 2

| Variable                                                                                                                                   | Wave 1<br>(N%) | Wave 2<br>N (%) | p-value <sup>b</sup> |
|--------------------------------------------------------------------------------------------------------------------------------------------|----------------|-----------------|----------------------|
| Stockpiling in the past month                                                                                                              |                |                 |                      |
| Bought less e-liquid than usual                                                                                                            | 227 (21.9)     | 306 (29.5)      | <b>p&lt;0.001</b>    |
| Bought about the same amount of e-liquid as usual                                                                                          | 738 (71.0)     | 687 (66.1)      |                      |
| Bought more e-liquid than usual                                                                                                            | 74 (7.1)       | 46 (4.4)        |                      |
| Price minimization techniques used in the past two weeks to save money on e-liquid <sup>a</sup>                                            |                |                 |                      |
| Bought a cheaper brand of e-liquid                                                                                                         | 703 (68.5)     | 630 (60.8)      | <b>p&lt;0.001</b>    |
| Made their own e-liquid                                                                                                                    | 61 (6.0)       | 44 (4.3)        | <b>p=0.02</b>        |
| Used cigarettes instead of e-cigarettes                                                                                                    | 477 (46.7)     | 498 (48.2)      | p=0.19               |
| Used buy 1 get 1 free or other special price promotions                                                                                    | 783 (76.2)     | 759 (73.5)      | p=0.05               |
| Purchased larger bottles of e-liquid                                                                                                       | 542 (52.8)     | 538 (52.0)      | p=0.58               |
| Found a less expensive retailer to buy e-liquid                                                                                            | 766 (74.8)     | 742 (71.8)      | p=0.05               |
| Used less e-liquid                                                                                                                         | 399 (39.1)     | 454 (44.0)      | <b>p=0.003</b>       |
| Used an e-liquid with a higher nicotine concentration                                                                                      | 227 (22.2)     | 227 (22.0)      | p=0.99               |
| Shared e-liquid less with others                                                                                                           | 471 (46.1)     | 517 (50.1)      | <b>p=0.02</b>        |
| <sup>a</sup> Participants could select more than one response                                                                              |                |                 |                      |
| <sup>b</sup> p-values were calculated using Wilcoxon signed rank test for stockpiling or McNemar's test for price minimization techniques. |                |                 |                      |

**Supplementary Table C.** Correlates of change in cigarette use status and frequency, controlling for weekly amount of money spent on cigarettes, demographics, and socioeconomic variables

| Variable                                                   | Change in cigarette use status                |                                               | Change in cigarette use frequency<br>$\beta$ (SE), p-value |
|------------------------------------------------------------|-----------------------------------------------|-----------------------------------------------|------------------------------------------------------------|
|                                                            | Increased use (vs. no change)<br>aOR (95% CI) | Decreased use (vs. no change)<br>aOR (95% CI) |                                                            |
| E-cigarette use status                                     |                                               |                                               |                                                            |
| Increased use                                              | 1.01 (0.28, 3.58)                             | <b>2.83 (1.04, 7.571)</b>                     | --                                                         |
| Stayed the same                                            | REF                                           | REF                                           | --                                                         |
| Decreased use                                              | <b>2.65 (1.71, 4.12)</b>                      | 0.78 (0.40, 1.52)                             | --                                                         |
| E-cigarette use frequency                                  | --                                            | --                                            | <b>-2.81 (1.06), p=0.008</b>                               |
| Note: Boldface denotes statistical significance $p < 0.05$ |                                               |                                               |                                                            |

**Supplementary Table D.** Association between change in price paid for e-liquid and e-cigarette / cigarette use, controlling for demographics, and socioeconomic variables

| Change in price paid for e-liquid per 60 ml | Change in e-cigarette use status           |                                            | Change in cigarette use status             |                                            | Change in e-cigarette use frequency | Change in cigarette use frequency |
|---------------------------------------------|--------------------------------------------|--------------------------------------------|--------------------------------------------|--------------------------------------------|-------------------------------------|-----------------------------------|
|                                             | Increased use (vs. no change) aOR (95% CI) | Decreased use (vs. no change) aOR (95% CI) | Increased use (vs. no change) aOR (95% CI) | Decreased use (vs. no change) aOR (95% CI) | $\beta$ (SE), p-value               | $\beta$ (SE), p-value             |
| Paid more for e-liquid at Wave 2            | 1.57 (0.44, 5.60)                          | 0.70 (0.45, 1.10)                          | 1.27 (0.72, 2.24)                          | 0.92 (0.58, 1.44)                          | 0.27 (0.16), p=0.10                 | -4.13 (4.68), p=0.38              |
| Paid the same for e-liquid at Wave 2        | REF                                        | REF                                        | REF                                        | REF                                        | REF                                 | REF                               |
| Paid less for e-liquid at Wave 2            | 2.69 (0.75, 9.63)                          | 1.14 (0.72, 1.81)                          | 1.48 (0.82, 2.69)                          | 1.14 (0.71, 1.84)                          | 0.21 (0.17), p=0.23                 | -3.84 (4.99), p=0.44              |

**Supplementary Table E.** E-liquid tax stamps in Indonesia in 2018

| Retail price level                                                                                                                                                                                                                                                                                                                                    | Ready-to-purchase tax stamps |            |             |             |
|-------------------------------------------------------------------------------------------------------------------------------------------------------------------------------------------------------------------------------------------------------------------------------------------------------------------------------------------------------|------------------------------|------------|-------------|-------------|
|                                                                                                                                                                                                                                                                                                                                                       | 15ml                         | 30ml       | 60ml        | 100ml       |
| 1 (retail price more than IDR 666 per ml)                                                                                                                                                                                                                                                                                                             | IDR 10,000                   | IDR 20,000 | IDR 40,000  | IDR 70,000  |
| 2 (retail price more than IDR 1,200 per ml)                                                                                                                                                                                                                                                                                                           | IDR 18,000                   | IDR 35,000 | IDR 60,000  | IDR 100,000 |
| 3 (retail price more than IDR 1,533 per ml)                                                                                                                                                                                                                                                                                                           | IDR 23,000                   | IDR 46,000 | IDR 92,000  | IDR 184,000 |
| 4 (retail price more than IDR 2,880 per ml)                                                                                                                                                                                                                                                                                                           | IDR 42,000                   | IDR 81,000 | IDR 161,000 | IDR 276,000 |
| <b>Note:</b> Manufacturers are required to purchase tax stamps from the central government and affix them before products can be sold. The tax level is based on the bottle size (among the 4 allowed bottle sizes) and 4 tiers of intended retail price, resulting in 16 available tax stamps. The minimum legal price is IDR 666 (0.05 USD) per ml. |                              |            |             |             |

Supplementary Table F. Loss to follow-up analysis

| Variable                                           | People who completed wave 1 and wave 2, n=1039    | People who completed wave 1 and did not complete wave 2, n=283 | p-value           |
|----------------------------------------------------|---------------------------------------------------|----------------------------------------------------------------|-------------------|
| Age                                                |                                                   |                                                                |                   |
| 18-24                                              | 65.4%                                             | 60.8%                                                          | p=0.15            |
| 25+                                                | 34.7%                                             | 39.2%                                                          |                   |
| Sex                                                |                                                   |                                                                |                   |
| Male                                               | 96.4%                                             | 96.5%                                                          | p=0.98            |
| Female                                             | 3.6%                                              | 3.5%                                                           |                   |
| Education attained                                 |                                                   |                                                                |                   |
| Less than high school                              | 2.0%                                              | 2.1%                                                           | p=0.19            |
| High school                                        | 58.5%                                             | 52.3%                                                          |                   |
| College/university                                 | 38.1%                                             | 43.1%                                                          |                   |
| Graduate degree                                    | 1.4%                                              | 2.5%                                                           |                   |
| Income, per month                                  |                                                   |                                                                |                   |
| IDR 0 - 1.5 million (<\$103 USD)                   | 32.3%                                             | 22.3%                                                          | <b>p&lt;0.001</b> |
| IDR 1.5 - 3.5 million (\$103-\$240 USD)            | 38.7%                                             | 40.1%                                                          |                   |
| IDR 3.5 - 7 million (\$240-\$480 USD)              | 23.1%                                             | 25.2%                                                          |                   |
| More than IDR 7 million (>\$480 USD)               | 6.0%                                              | 12.4%                                                          |                   |
| Urban status                                       |                                                   |                                                                |                   |
| Urban                                              | 64.1%                                             | 68.1%                                                          | p=0.11            |
| Suburban                                           | 26.5%                                             | 20.6%                                                          |                   |
| Rural                                              | 9.4%                                              | 11.4%                                                          |                   |
| E-liquid price per 60 ml, mean (SD)                | IDR: 137839.4<br>(112833.3)<br><br>USD: 9.5 (7.8) | IDR 138112<br>(84725.7)<br><br>USD: 9.4 (5.8)                  | p=0.96            |
| Recall of tax stamp                                |                                                   |                                                                |                   |
| No                                                 | 77.5%                                             | 72.4%                                                          | p=0.07            |
| Yes                                                | 22.5%                                             | 21.3%                                                          |                   |
| E-cigarette use status                             |                                                   |                                                                |                   |
| None*                                              | --                                                |                                                                |                   |
| Non-daily                                          | 24.1%                                             | 24.7%                                                          | p=0.81            |
| Daily                                              | 75.9%                                             | 75.3%                                                          |                   |
| Number of past 7 days used e-cigarettes, mean (SD) | 5.7 (1.9)                                         | 5.7 (1.9)                                                      | p=0.59            |
| Cigarette use status                               |                                                   |                                                                |                   |
| None—completely quit smoking                       | 20.5%                                             | 17.0%                                                          | p=0.35            |
| Non-daily                                          | 51.2%                                             | 55.1%                                                          |                   |
| Daily                                              | 28.3%                                             | 27.9%                                                          |                   |
| Cigarettes per week (all smokers), mean (SD)       | 34.2 (54.7)                                       | 42.1 (89.3)                                                    | p=0.16            |
